# Supplementary material for: In vivo cleavage of a target RNA by copper kanamycin A. Direct observation by a fluorescence assayElectronic supplementary material (ESI) available: experimental details for plasmid construction, and the fluorescence and assay measurements. See http://www.rsc.org/suppdata/cc/b1/b108439a/
Source: Royal Society of Chemistry journal article supplement (doi:10.1039/b108439a), 2002-01-17
Supplement: b108439a.doc [file b108439a.doc]

**SUPPLEMENTARY MATERIAL FOR**

**In Vivo Cleavage of a Target RNA by Copper Kanamycin A. Direct Observation by a Fluorescence Assay.**

Chun-An Chen and J. A. Cowan.

# **Experimental Section.**

Molecular biology protocols were generally followed according to reference 14.

***Construction of pET-21GFP****:* The gene for GFP protein was taken from the commercial vector pGFP-C2 (Clonetech) by restriction digestion and cloned into the Nhe I/EcoR I digested pET-21b(+) expression vector (Novagen). The resulting plasmid (pET-21GFP) was transformed into *Escherichia coli* strain BL21(DE3).

***Construction of pET-21GFPR****:* The complementary DNA sequences of R23 (5’-AGC TTG GCC TGG GCG AGA AGT TTA GGC CG-3’ and 5’- GAT CGG GCC TAA ACT TCT CGC CCA GGC CA-3’) was introduced into the Hind III/BamH I pGFP-C2 digested vector . Subsequently the gene for the GFP-R23 fusion protein was cloned into the Nhe I/BamH I sites of pET -21b(+) and the resulting plasmid (pET-21GFPR) was transformed into *Escherichia coli* strain BL21(DE3).

***Expression of pET-21GFP* *and pET-21GFPR* *in BL21(DE3)****:* Both pET-21GFP and pET-21GFPR plasmids were expressed in *Escherichia coli* strain BL21(DE3) with ampicillin selection. Cells were grown to an OD600 of 0.80.1, and overexpression was induced with 1 mM IPTG at 37oC incubation. After 4 h expression the cells were harvested and washed once with PBS buffer.

**Fluorescence measurements on expressed GFP and GFPR proteins:** Cell pellets from the pET-21GFP and pET-21GFPR plasmid cell lines were resuspended in 400L PBS and the fluorescence measured using ex = 395 nm. The resulting spectrum is shown in Figure 2. Alternatively, the cell pellet of the pET-21bGFP cell line was lysed for 30 min with 1% triton and lysozyme in PBS buffer on ice with vigorous vortexing. After centrifugation (>14000 rpm), the emission from the supernatant was measured (Figure 2).

***Assay for copper kanamycin A cleavage of R23***.Cells were grown to an OD600 of 0.80.1 in 100 mL LB, and IPTG and ampicillin were added to final concentration of 1 mM and 50 g/mL, respectively. The resulting cell culture was divided into 5 mL aliquots in 50 mL Corning tubes. Copper kanamycin A or kanamycin A (control experiment) were added to a final concentration of 0, 1,2, 4, 6, 10, 20, 40, and 80 M. Following incubation at 37 oC for 4 h the cells were harvested and washed 1x with phosphate buffered saline (PBS). Finally, the cell mass was lysed with 1% triton and lysozyme in PBS for 30 min on ice with vigorously vortex. The fluorescence readings for each reaction were collected from a fluorescent 96-well reader. The data from the cleavage assay was plotted as the fluorescent intensity against final concentration of copper kanamycin A or kanamycin A in cell culture (Figure 3).
